# Supplementary material for: Alternative host shapes transmission and life-history trait correlations in a multi-host plant pathogen
Source: bioRxiv or medRxiv preprint supplement (doi:10.1101/2022.06.17.496551), 2022-06-17

## Supplementary Material

**Supplementary Table 1.** The sites surveyed for downy mildew *Peronospora sparsa* disease severity in *Rubus arcticus*, *R. chamaemorus*, and *R. saxatilis* in 2019. Mean infection prevalence and severity are shown.

| Site                                               | Abbreviation | Latitude  | Longitude  | Species present       | Infection prevalence | Mean disease severity |
|----------------------------------------------------|--------------|-----------|------------|-----------------------|----------------------|-----------------------|
| Alajärvi                                           | ala          | 62.999923 | 23.815814  | <i>R. arcticus</i>    | 0.10                 | 0.10                  |
| Kauhajoki                                          | kauh         | 63.186563 | 23.294037  | <i>R. arcticus</i>    | 0.66                 | 0.06                  |
| Kajaani                                            | arm          | 64.174243 | 27.715207  | <i>R. chamaemorus</i> | 0.90                 | 0.33                  |
| Takkarannantie,<br>Kajaani                         | tak          | 64.247510 | 27.839014  | <i>R. arcticus</i>    | 0.50                 | 0.04                  |
| Takkarannantie,<br>Kajaani                         | tak          | 64.247510 | 27.839014  | <i>R. chamaemorus</i> | 0.80                 | 0.25                  |
| Honkalampi                                         | hon          | 63.025314 | 28.1729245 | <i>R. arcticus</i>    | 0.50                 | 0.04                  |
| Honkalampi                                         | hon          | 63.025314 | 28.1729245 | <i>R. saxatilis</i>   | 0.10                 | 0.03                  |
| Jormua                                             | jor          | 64.297225 | 27.9876965 | <i>R. arcticus</i>    | 0.15                 | 0.04                  |
| Jormua                                             | jor          | 64.297225 | 27.9876965 | <i>R. saxatilis</i>   | 0.05                 | 0.02                  |
| Kaurastensuo                                       | kau          | 61.031624 | 24.976035  | <i>R. arcticus</i>    | 1.00                 | 0.05                  |
| Kaurastensuo                                       | kau          | 61.031624 | 24.976035  | <i>R. saxatilis</i>   | 0.90                 | 0.03                  |
| Kestilä                                            | kes          | 64.183833 | 26.3703685 | <i>R. arcticus</i>    | 0.90                 | 0.05                  |
| Kestilä                                            | kes          | 64.183833 | 26.3703685 | <i>R. saxatilis</i>   | 0.90                 | 0.04                  |
| Koskitie, Kestilä                                  | kos          | 64.183833 | 26.370385  | <i>R. arcticus</i>    | 0.30                 | 0.02                  |
| Koskitie, Kestilä                                  | kos          | 64.183833 | 26.370385  | <i>R. saxatilis</i>   | 0.20                 | 0.02                  |
| Kahilantie, Kurikka                                | kahi         | 62.567315 | 22.554436  | <i>R. arcticus</i>    | 0.20                 | 0.05                  |
| Kahilantie, Kurikka<br>Pättikankaantie,<br>Kurikka | pat          | 62.653455 | 22.3201875 | <i>R. arcticus</i>    | 0.80                 | 0.08                  |
| Peuraniemi                                         | pn           | 64.252572 | 27.851174  | <i>R. arcticus</i>    | 0.30                 | 0.11                  |
| Peuraniemi                                         | pn           | 64.252572 | 27.851174  | <i>R. chamaemorus</i> | 0.60                 | 0.16                  |
| Peuravaara                                         | pv           | 64.637464 | 28.163065  | <i>R. arcticus</i>    | 0.17                 | 0.04                  |
| Peuravaara                                         | pv           | 64.637464 | 28.163065  | <i>R. chamaemorus</i> | 0.68                 | 0.11                  |
| Ranta, Muuruvesi                                   | rant         | 63.010897 | 28.214126  | <i>R. arcticus</i>    | 0.10                 | 0.07                  |
| Kuopio                                             | kuo          | 62.783636 | 27.502745  | <i>R. arcticus</i>    | 0.95                 | 0.12                  |
| Kuopio                                             | kuo          | 62.783636 | 27.502745  | <i>R. saxatilis</i>   | 0.30                 | 0.01                  |
| Kurikka                                            | saar         | 62.540290 | 22.058072  | <i>R. arcticus</i>    | 0.30                 | 0.04                  |
| Kajaani                                            | teb          | 64.232523 | 27.7965815 | <i>R. arcticus</i>    | 0.05                 | 0.02                  |
| Berry farm, Muuruvesi                              | marj         | 63.012262 | 28.2140395 | <i>R. arcticus</i>    | 1.00                 | 0.11                  |
| Varessäikkä                                        | var          | 64.884687 | 24.8196765 | <i>R. arcticus</i>    | 1.00                 | 0.09                  |
| Varessäikkä                                        | var          | 64.884687 | 24.8196765 | <i>R. saxatilis</i>   | 0.05                 | 0.11                  |
| Viinikka                                           | vii          | 63.162677 | 23.323661  | <i>R. arcticus</i>    | 0.60                 | 0.09                  |
| Viinikka                                           | vii          | 63.162677 | 23.323661  | <i>R. chamaemorus</i> | 0.30                 | 0.19                  |

**Supplementary Table 2.** The sites used in the *Rubus arcticus* trap plant experiment in 2021.

| Site                     | Abbreviation | Latitude   | Longitude   | Infection prevalence | Mean disease severity |
|--------------------------|--------------|------------|-------------|----------------------|-----------------------|
| Honkalampi               | HON          | 63.025314  | 28.1729245  | 0.58                 | 0.17                  |
| Hongikonluoma            | HONG         | 63.177292  | 23.32972652 | 1.00                 | 1.00                  |
| Kaihlakyrö               | KAIH         | 62.508367  | 22.5961235  | 0.93                 | 0.37                  |
| Kestilä                  | KEST         | 64.183833  | 26.3703685  | 0.77                 | 0.19                  |
| Kevo                     | KEV          | 69.723507  | 27.0408455  | 0.83                 | 0.55                  |
| Station, Kevo            | KEVS         | 69.757128  | 27.0107795  | 0.77                 | 0.34                  |
| Korretoja                | KOR          | 69.623164  | 27.128794   | 1.00                 | 0.52                  |
| Kortteisen tekojärvi     | KORJ         | 64.174479  | 26.1048475  | 0.90                 | 0.22                  |
| Muuruvesi                | MARJ         | 63.012262  | 28.2140395  | 0.92                 | 0.67                  |
| Ojaniementie             | OJA          | 62.47891   | 22.3608345  | 0.91                 | 0.81                  |
| Pahkalampi               | PAH          | 63.1246021 | 28.17965175 | 0.55                 | 0.20                  |
| Pättikankaantie, Kurikka | PÄT          | 62.653455  | 22.3201875  | 0.79                 | 0.35                  |
| Revonkanta               | REV          | 64.419568  | 28.4196135  | 0.50                 | 0.12                  |
| Ristimaantie             | RIS          | 63.15507   | 23.09796815 | 0.67                 | 0.63                  |
| Säärenperä               | SÄÄ          | 64.90069   | 25.01446965 | 1.00                 | 0.96                  |
| Takalahdenkuja           | TAKA         | 63.22758   | 23.26324448 | 0.84                 | 0.29                  |
| Tavastperä               | TAV          | 64.169853  | 26.4197305  | 0.96                 | 0.20                  |
| Kajaani                  | TEB          | 64.232523  | 27.7965815  | 0.71                 | 0.57                  |
| Tikkaperä                | TIK          | 64.76379   | 25.2793305  | 0.91                 | 0.40                  |
| Varessäikkä              | VAR          | 64.884687  | 24.8196765  | 0.69                 | 0.15                  |

**Supplementary Table 3.** The material used in the *Peronospora sparsa* inoculation experiment on *Rubus arcticus*, *R. chamaemorus* and *R. saxatilis*.

| Material                           | Site of origin           | latitude  | longitude |
|------------------------------------|--------------------------|-----------|-----------|
| <i>Peronospora sparsa</i> strains  |                          |           |           |
| HONG                               | Hongikonluoma            | 63.17729  | 23.32973  |
| KAIH                               | Kaihla kyrö              | 62.50837  | 22.59612  |
| KEV                                | Kevo                     | 69.72351  | 27.04085  |
| MARJ                               | Berry farm, Muuruvesi    | 63.01226  | 28.21404  |
| OJA                                | Ojaniementie             | 62.47891  | 22.36083  |
| PAH                                | Pahkalampi               | 63.1246   | 28.17965  |
| SÄÄ                                | Säärenperä               | 64.90069  | 25.01447  |
| TAV                                | Tavastsaikkä             | 64.16985  | 26.41973  |
| TEB                                | Kajaani                  | 64.23252  | 27.79658  |
| TIK                                | Tikkaperä                | 64.76379  | 25.27933  |
| <i>Rubus arcticus</i> genotypes    |                          |           |           |
| Pima                               | Cultivar                 |           |           |
| kos                                | Koskitie, Kestilä        | 64.183833 | 26.370385 |
| P                                  | Pättikankaantie, Kurikka | 62.65346  | 22.32019  |
| Teb                                | Kajaani                  | 64.23252  | 27.79658  |
| kau                                | Kaurastensuo             | 61.031624 | 24.976035 |
| KEST                               | Kestilä                  | 64.18383  | 26.37037  |
| m22                                | Honkalampi               | 63.02531  | 28.17292  |
| JOM                                | Jormua                   | 64.29723  | 27.98769  |
| HONG                               | Hogikonluoma             | 63.17729  | 23.32973  |
| VAR                                | Varessaikkä              | 64.88469  | 24.81968  |
| VII                                | Viinikka                 | 63.162677 | 23.323661 |
| <i>Rubus chamaemorus</i> genotypes |                          |           |           |
| Haaga                              | Haaga                    | 60.22158  | 24.89354  |
| LAM                                | Lamminjärvi              | 61.07532  | 25.0505   |
| VIIN                               | Viinikka                 | 63.162677 | 23.323661 |
| ARM                                | Kajaani                  | 64.174243 | 27.715207 |
| <i>Rubus saxatilis</i> genotypes   |                          |           |           |
| VA                                 | Varessaikkä              | 64.88469  | 24.81968  |
| ÅI                                 | Åland Islands            | 60.16973  | 19.97117  |
| HON                                | Honkalapi                | 63.02531  | 28.17292  |
| kes                                | Kestiläntie              | 64.18383  | 26.37037  |
| kevo                               | Kevo                     | 69.72351  | 27.04085  |

**Supplementary Table 4.** The results from regression analyses among the site variables in the *Rubus arcticus* trap plant experiment.

| Latitude                       | $R^2$  | $P$    |
|--------------------------------|--------|--------|
| <i>R. chamaemorus</i> coverage | 0.0188 | 0.5582 |
| <i>R. saxatilis</i> coverage   | 0.0858 | 0.1976 |
| <i>R. arcticus</i> coverage    | 0.1491 | 0.0921 |
| Shannon's diversity            | 0.0321 | 0.4495 |

  

| Shannon's diversity            | $R^2$ | $P$    |
|--------------------------------|-------|--------|
| <i>R. chamaemorus</i> coverage | 0.142 | 0.1015 |
| <i>R. saxatilis</i> coverage   | 0.061 | 0.2938 |
| <i>R. arcticus</i> coverage    | 0.002 | 0.9564 |

  

| <i>R. arcticus</i> coverage    | $R^2$  | $P$    |
|--------------------------------|--------|--------|
| <i>R. chamaemorus</i> coverage | 0.0816 | 0.2094 |
| <i>R. saxatilis</i> coverage   | 0.0039 | 0.7868 |

**Supplementary Figure 1.** (a) The wild and cultivated sampling and survey locations of *Peronospora sparsa* on *Rubus arcticus*, *R. chamaemorus*, and *R. saxatilis* in 2019. Symptoms of *P. sparsa* on (b) *R. arcticus*, (c) *R. chamaemorus*, (d) *R. saxatilis*.

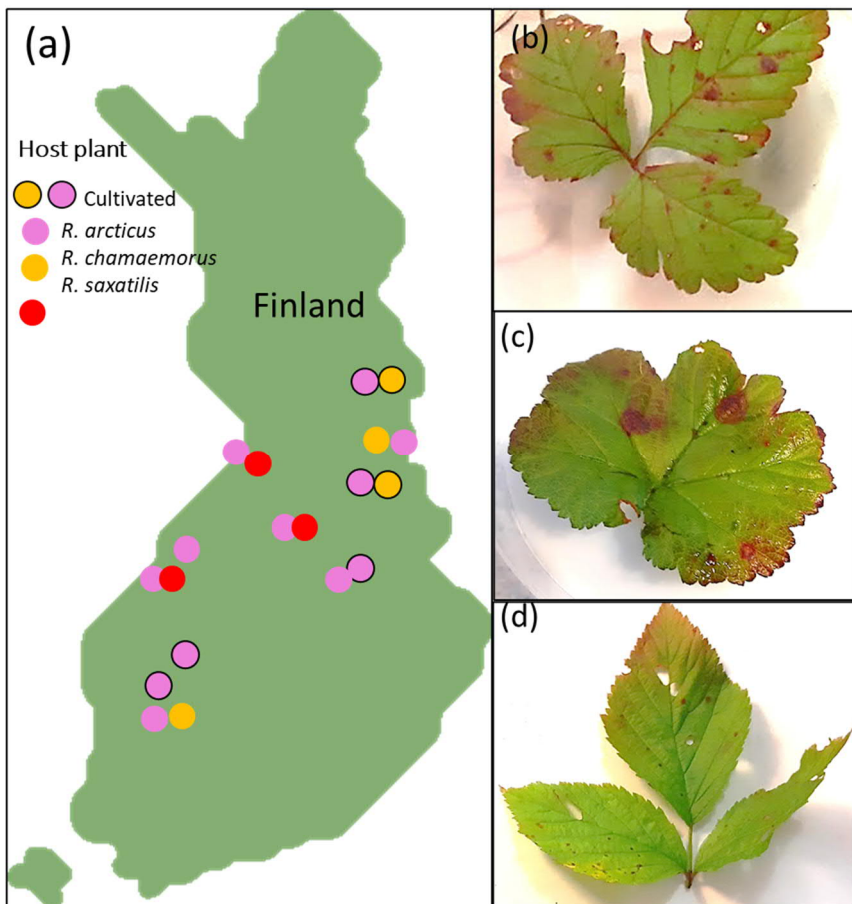

Supplement: Supplementary file [file media-1.pdf]
